# Supplementary material for: Mononuclear Co(ii) polypyridyl complexes: synthesis, molecular structure, DNA binding/cleavage, radical scavenging, docking studies and anticancer activities
Source: Royal Society of Chemistry journal article supplement (doi:10.1039/d1dt04144d), 2022-01-01
Supplement: d1dt04144d1.pdf [file d1dt04144d1.pdf]

## Supplementary Information

### **Mononuclear Co(II) polypyridyl complexes: synthesis, molecular structure, DNA binding/cleavage, radical scavenging, docking studies and anticancer activities**

Kalai Selvan Karumban<sup>a†</sup>, Arabinda Muley<sup>a†</sup>, Rajnikant Raut<sup>b</sup>, Parth Gupta<sup>b</sup>, Bishnubasu Giri<sup>a</sup>,  
Sadananda Kumbhakar<sup>a</sup>, Ashish Misra<sup>b\*</sup> and Somnath Maji<sup>a\*</sup>

*<sup>a</sup>Department of Chemistry, Indian Institute of Technology, Hyderabad, Kandi, Sangareddy  
502284*

*Telangana, India*

*E-mail: [smaji@chy.iith.ac.in](mailto:smaji@chy.iith.ac.in)*

*<sup>b</sup>Department of Biotechnology, Indian Institute of Technology, Hyderabad, Kandi,  
Sangareddy 502284*

*Telangana, India*

*E-mail: [ashishmisra@bt.iith.ac.in](mailto:ashishmisra@bt.iith.ac.in)*

† These authors contributed equally to this work.

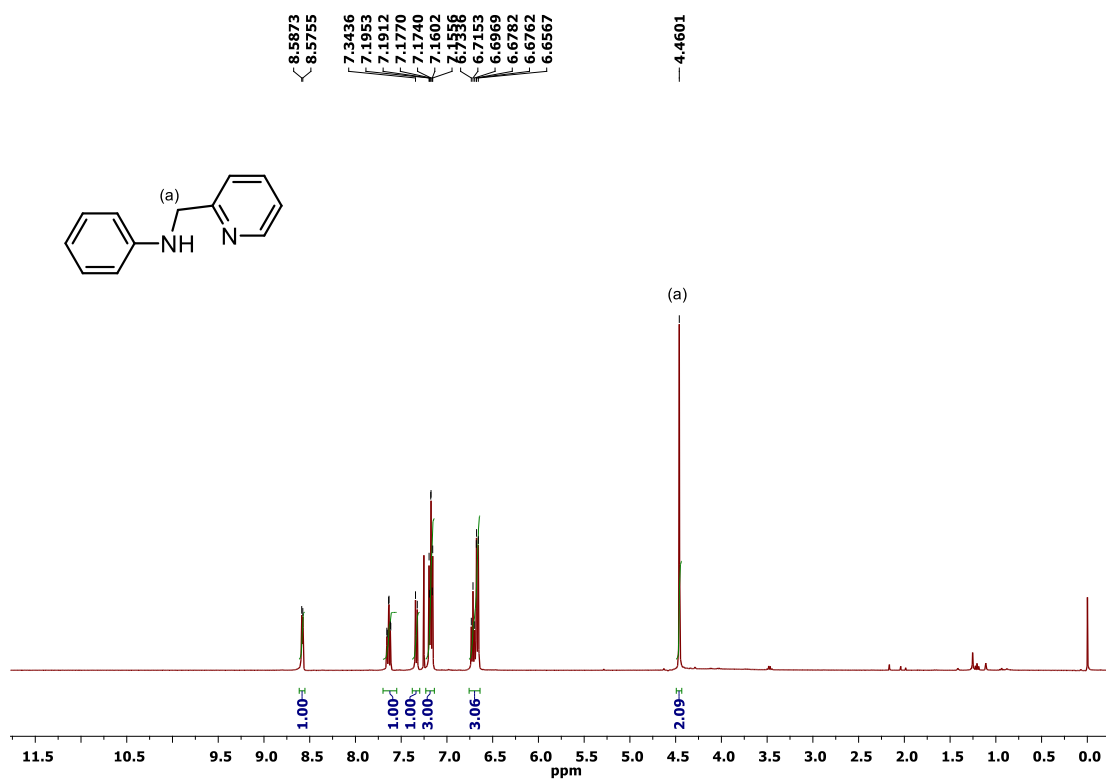

**Fig. S1.** <sup>1</sup>H NMR of N-(pyridin-2-ylmethyl)aniline in CDCl<sub>3</sub> at room temperature.

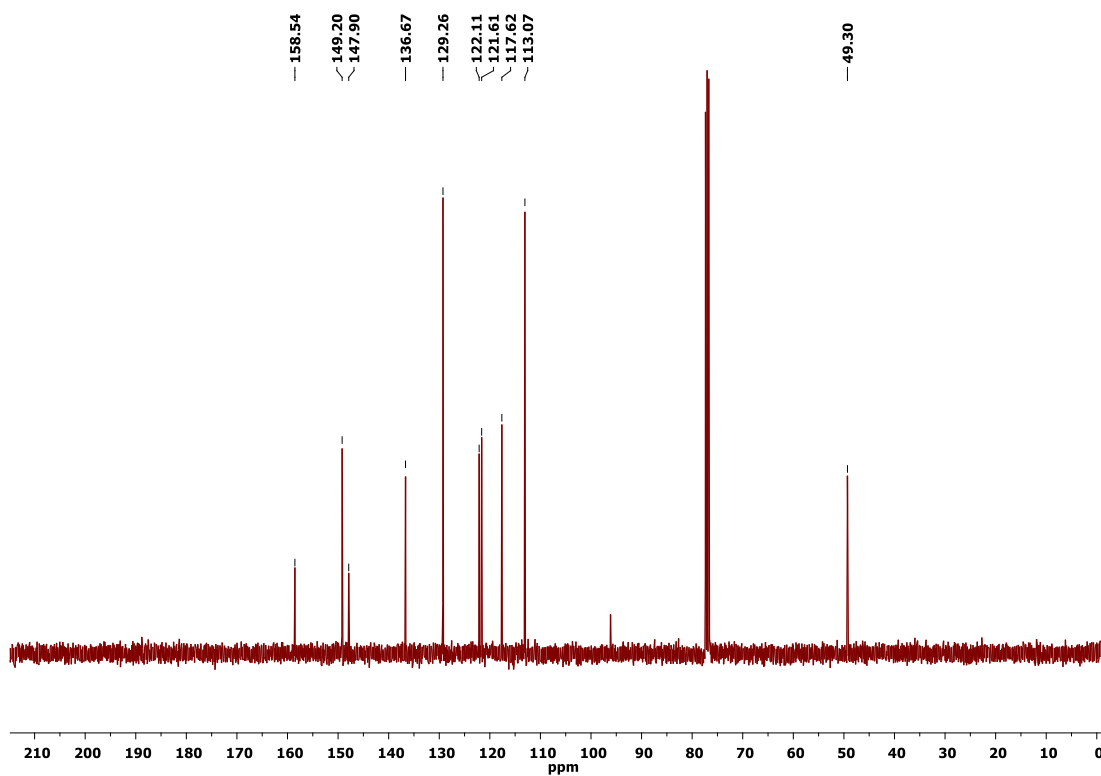

**Fig. S2.** <sup>13</sup>C NMR of N-(pyridin-2-ylmethyl)aniline in CDCl<sub>3</sub> at room temperature.

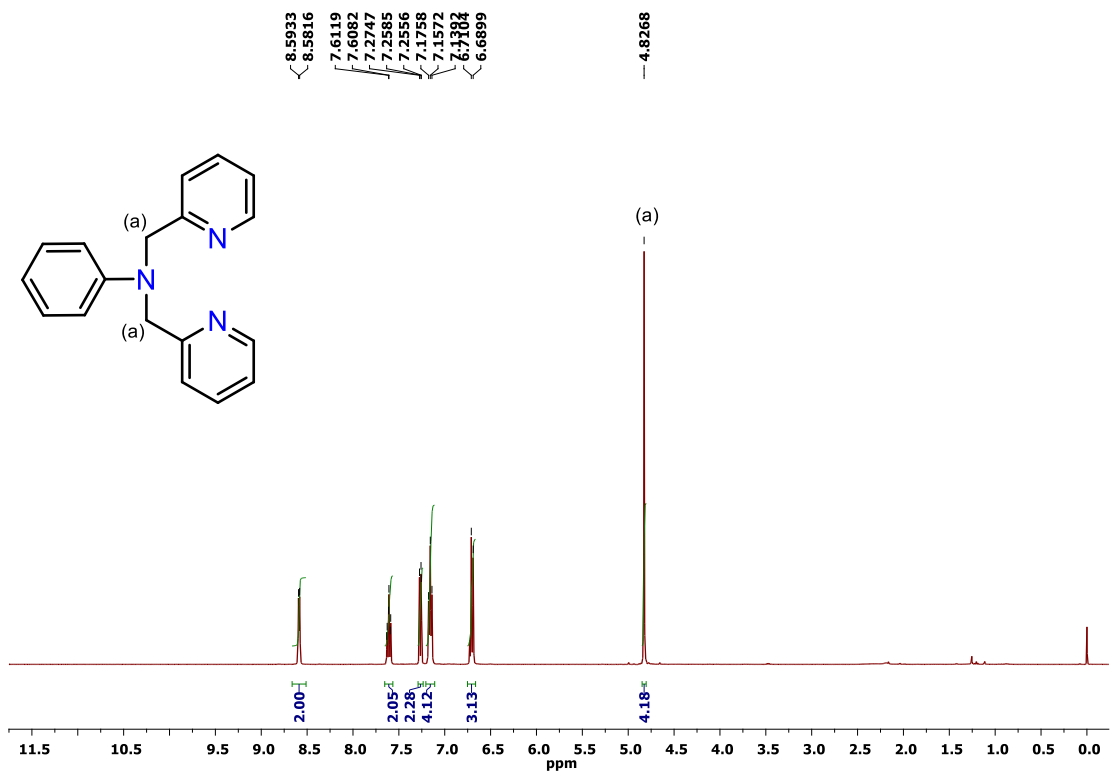

**Fig. S3.** <sup>1</sup>H NMR of **L** in CDCl<sub>3</sub> at room temperature.

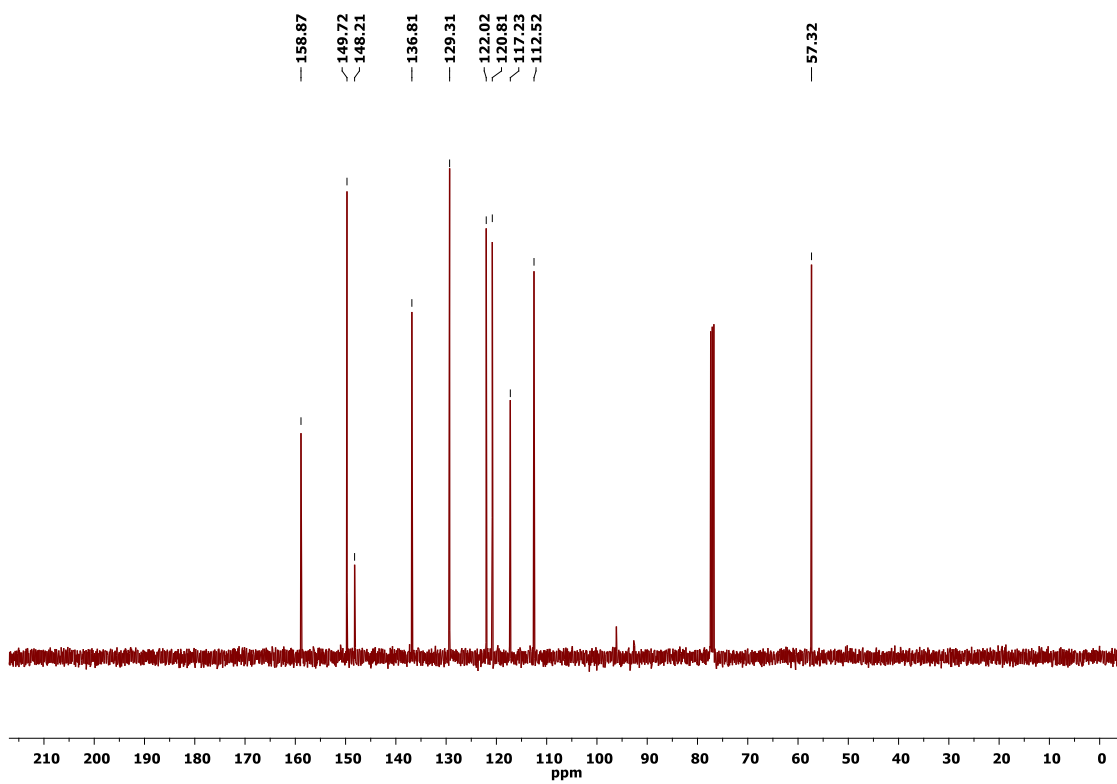

**Fig. S4.** <sup>13</sup>C NMR of **L** in CDCl<sub>3</sub> at room temperature.

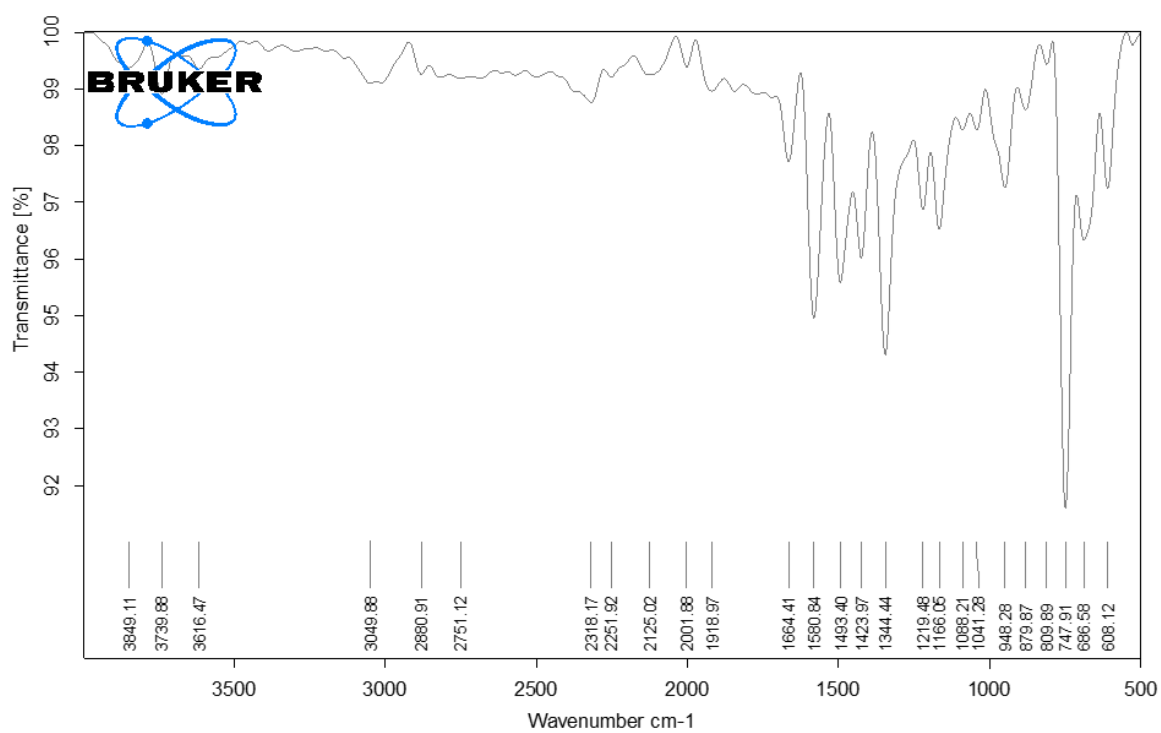

**Fig. S5.** FT-IR (Solid) spectrum of **L**.

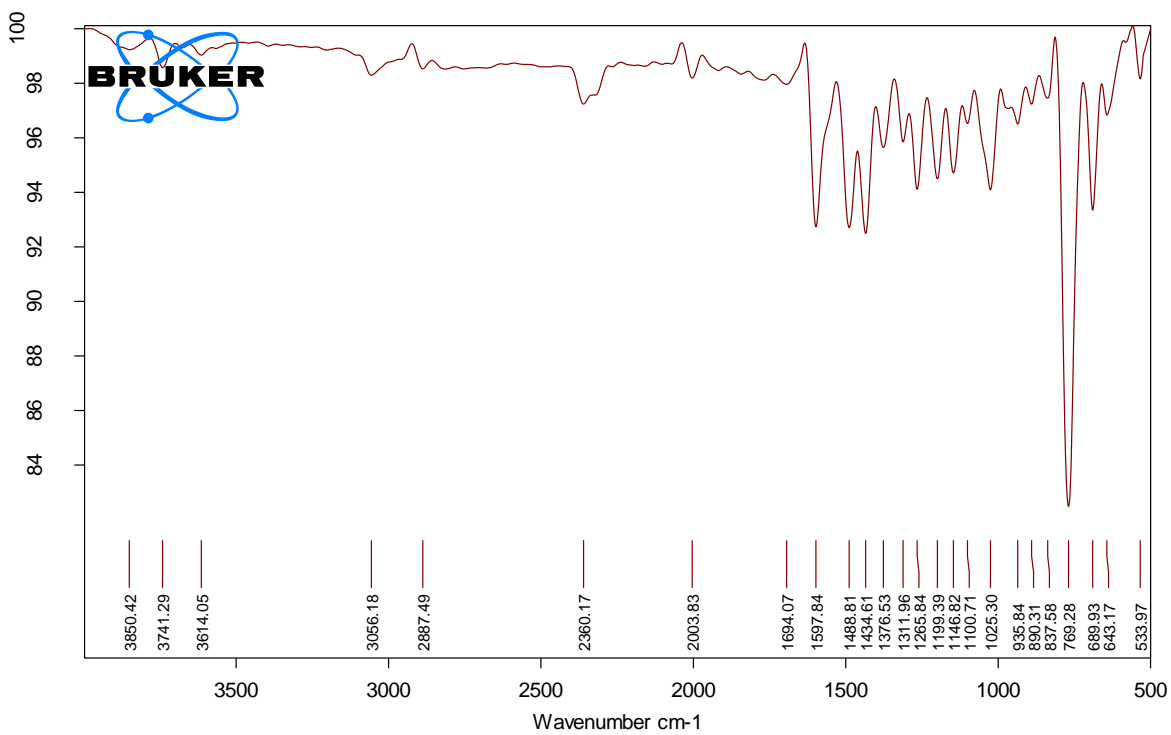

**Fig. S6.** FT-IR (Solid) spectrum of **1**.

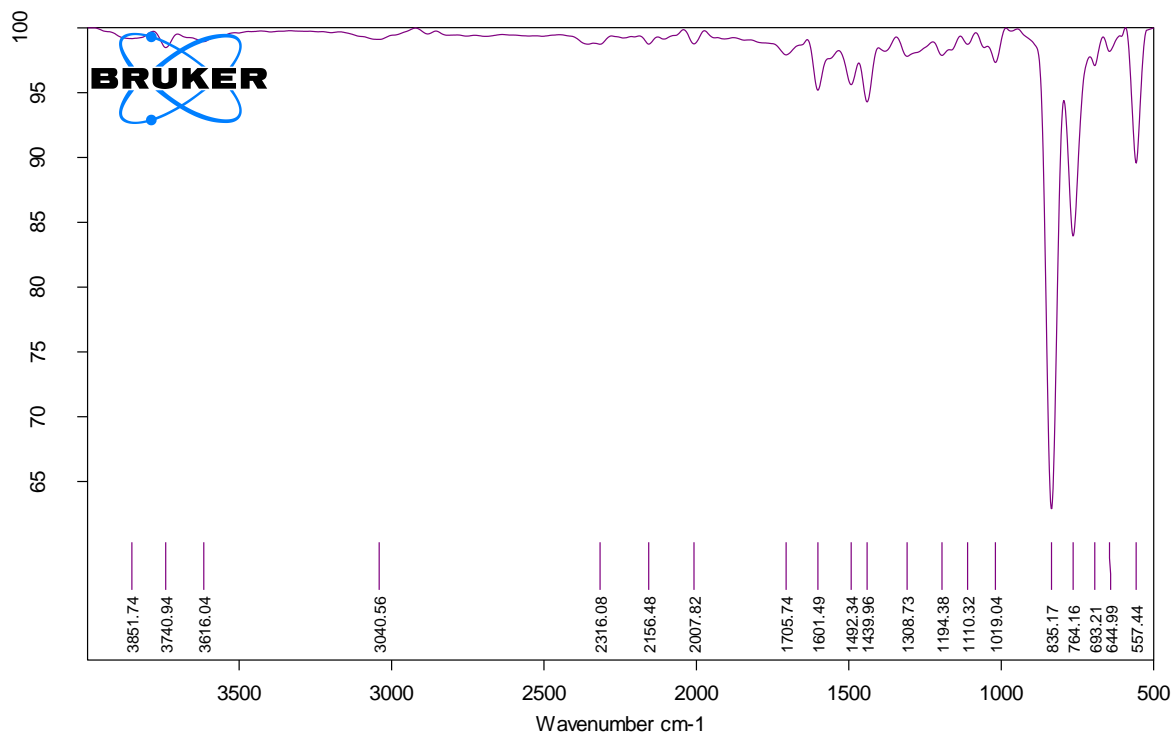

**Fig. S7.** FT-IR (Solid) spectrum of **2**.

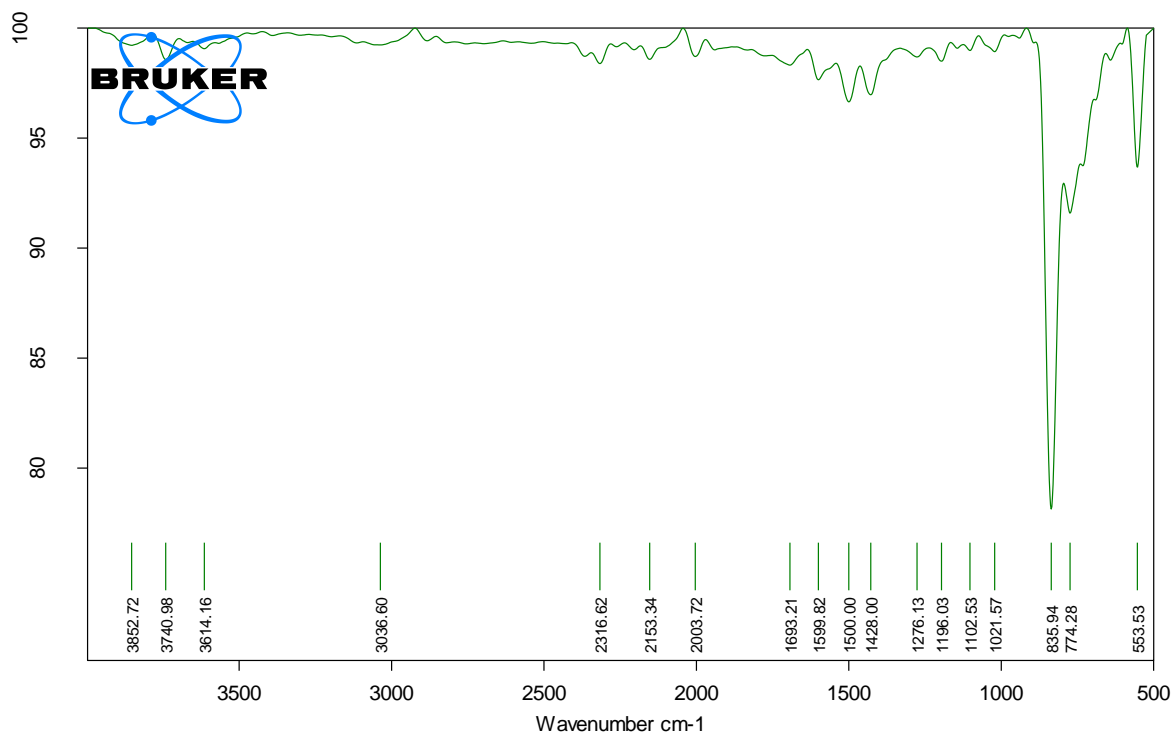

**Fig. S8.** FT-IR (Solid) spectrum of **3**.

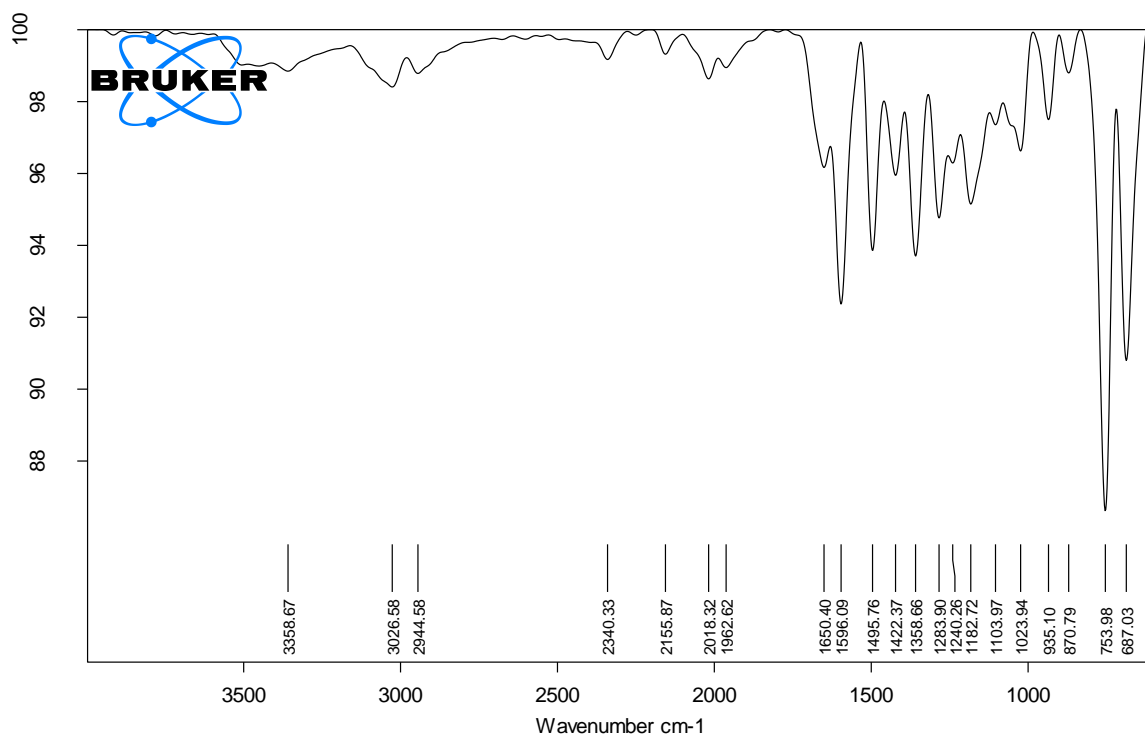

**Fig. S9.** FT-IR (Solid) spectrum of **4**.

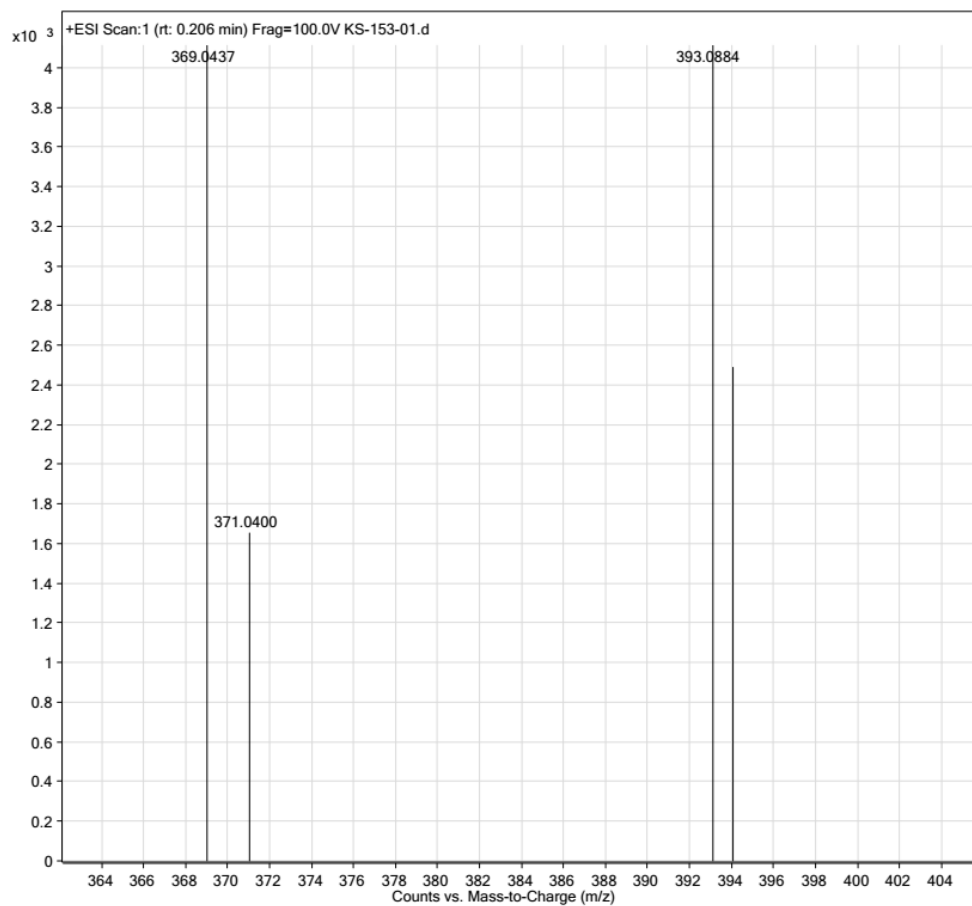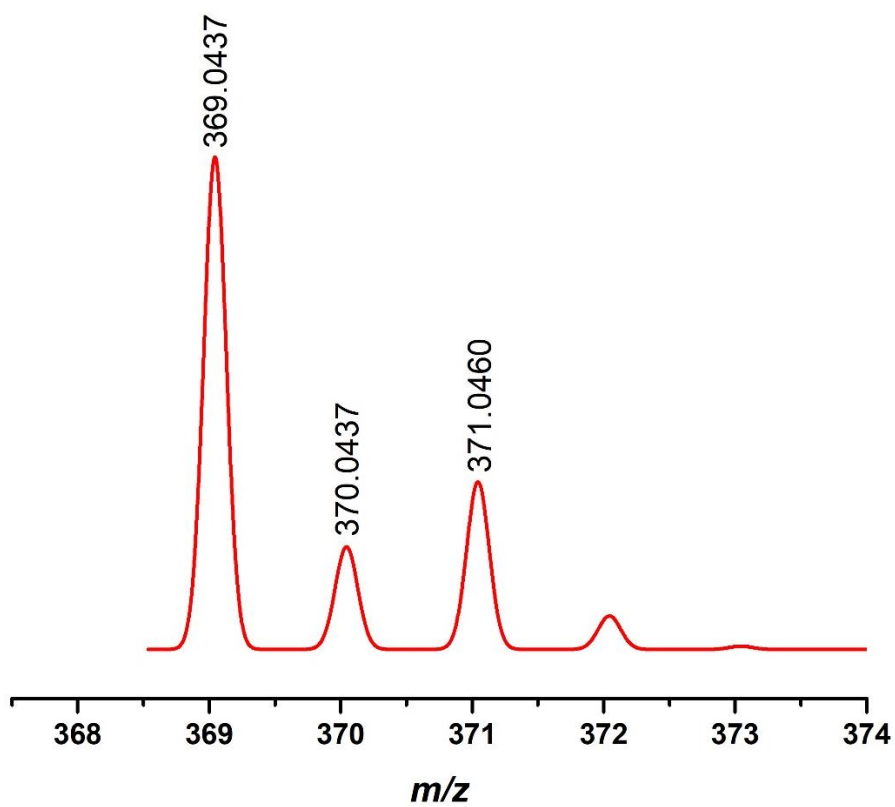

**Fig. S10.** HRMS spectrum of **1** (top) with their simulated mass spectra (bottom).

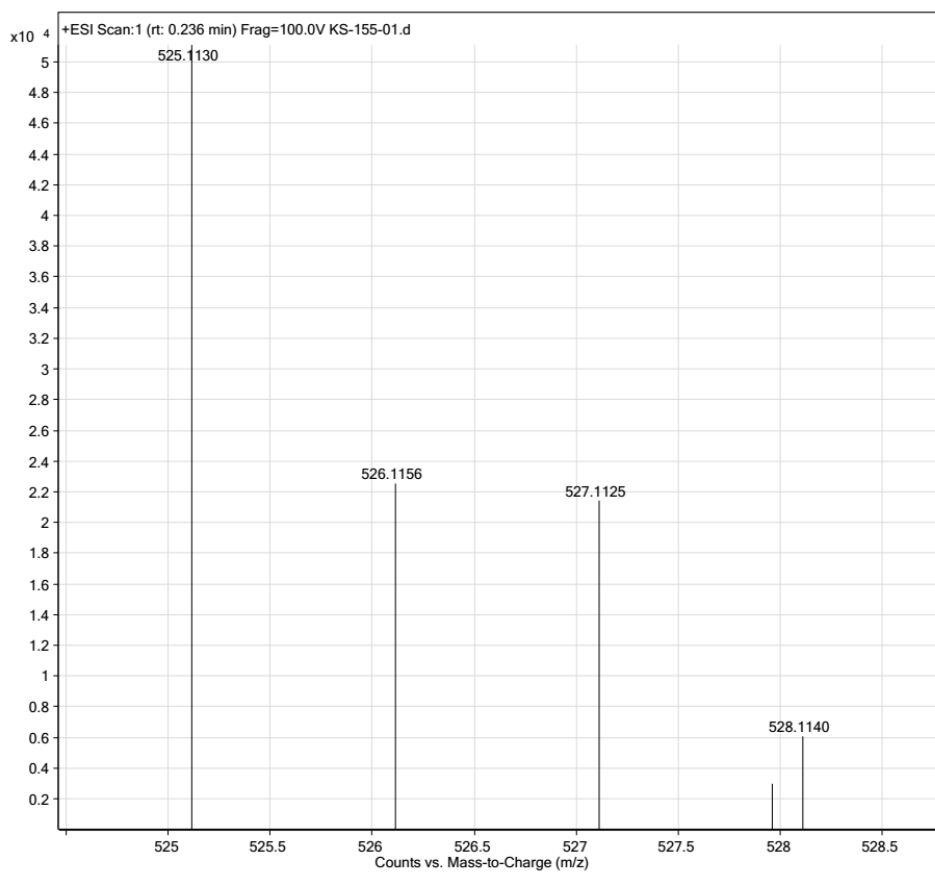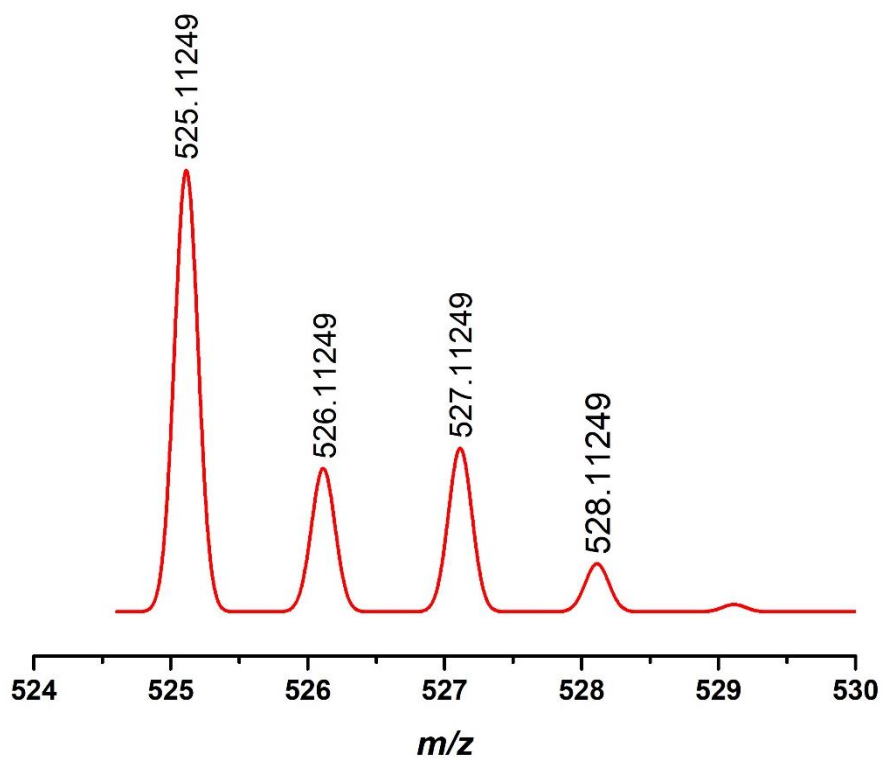

**Fig. S11.** HRMS spectrum of **2** (top) with their simulated mass spectra (bottom).



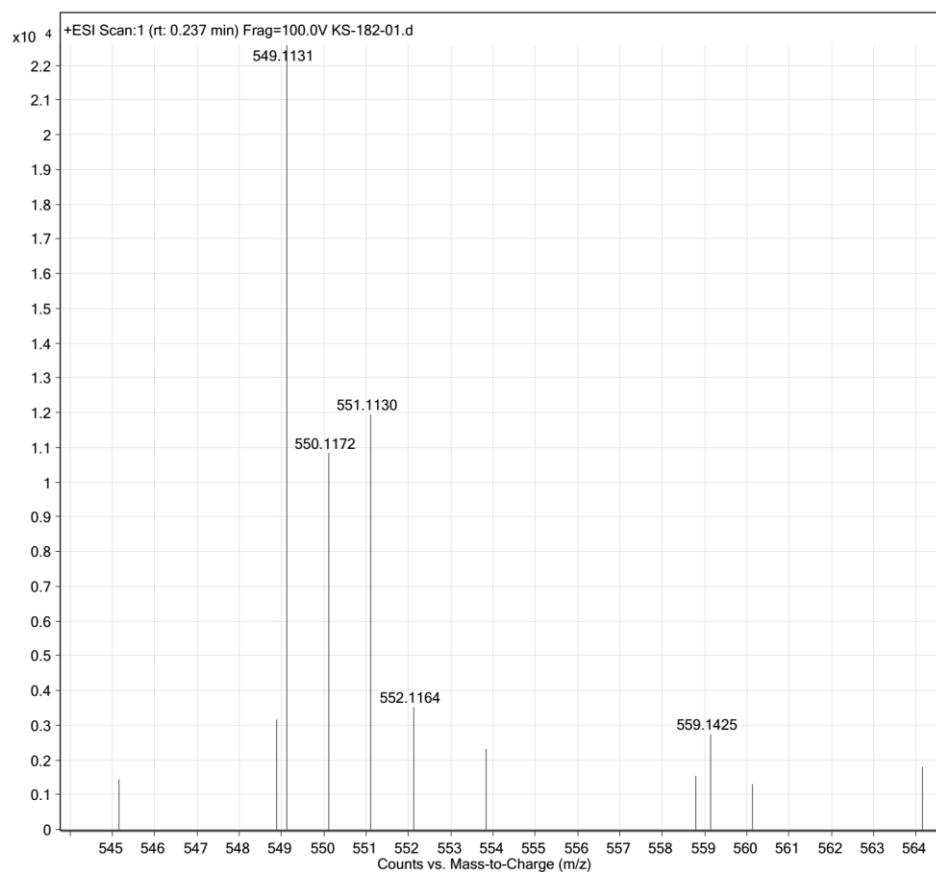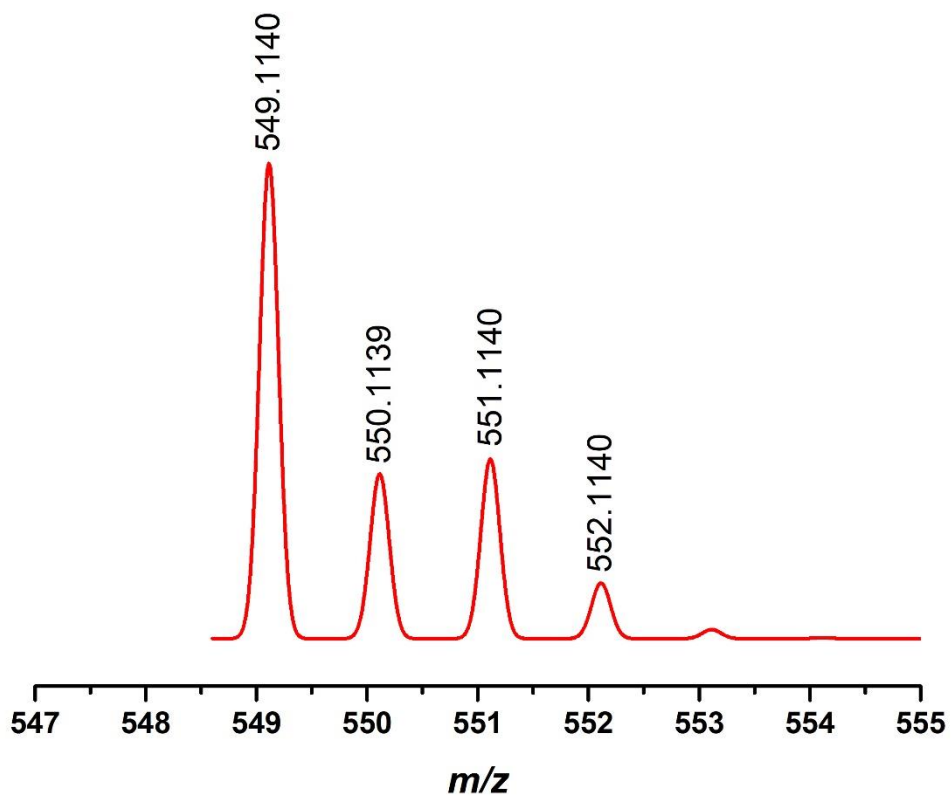

**Fig. S12.** HRMS spectrum of **3** (top) with their simulated mass spectra (bottom).

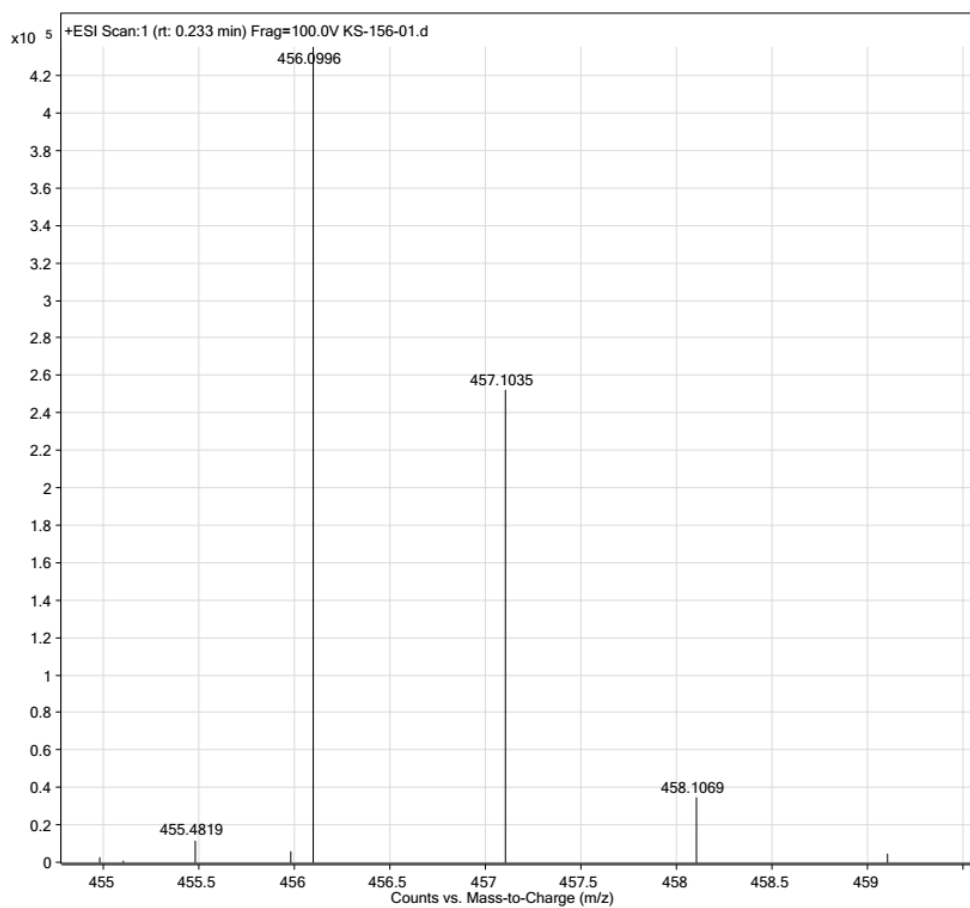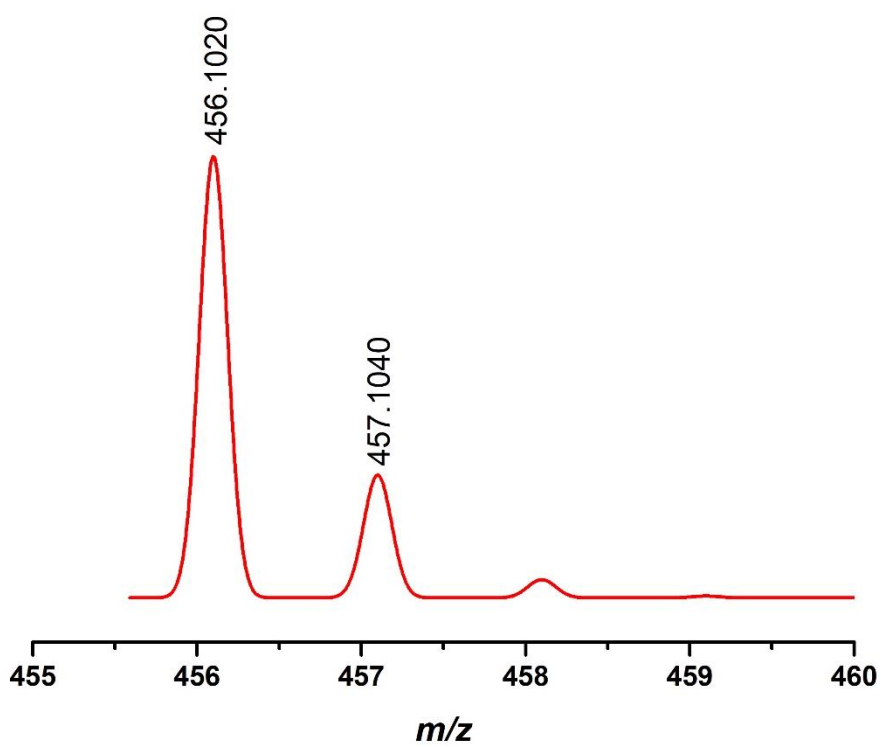

**Fig. S13.** HRMS spectrum of **4** (top) with their simulated mass spectra (bottom).

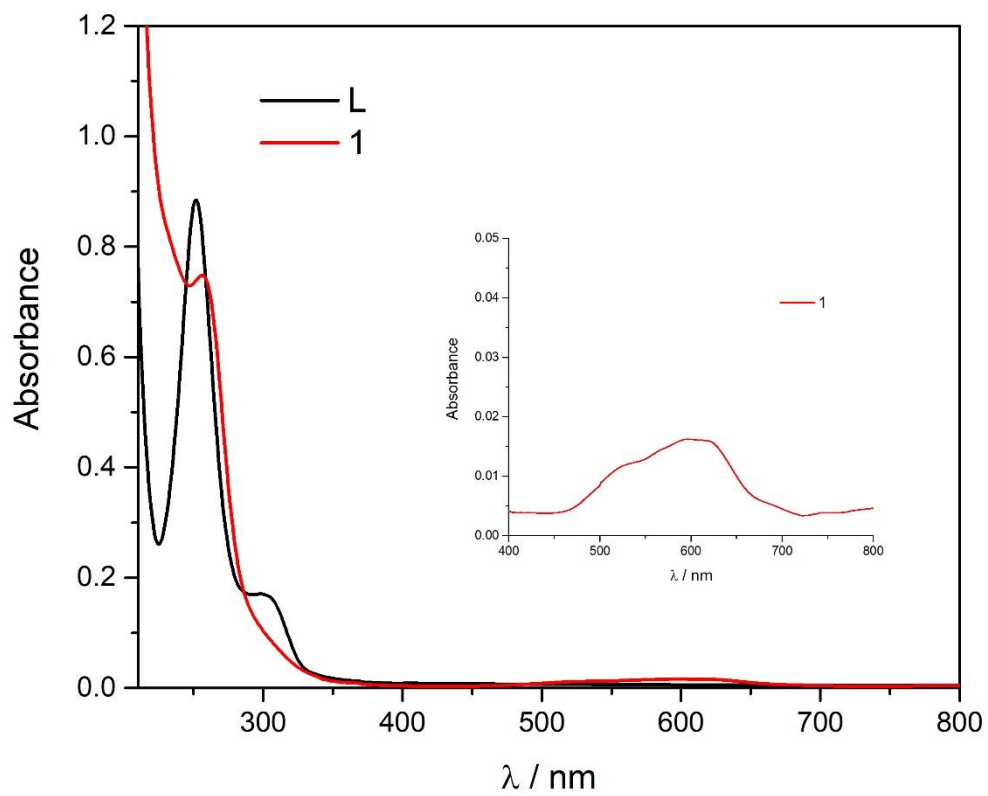

**Fig. S14.** UV-vis spectrum of L and complexes 1 in acetonitrile.

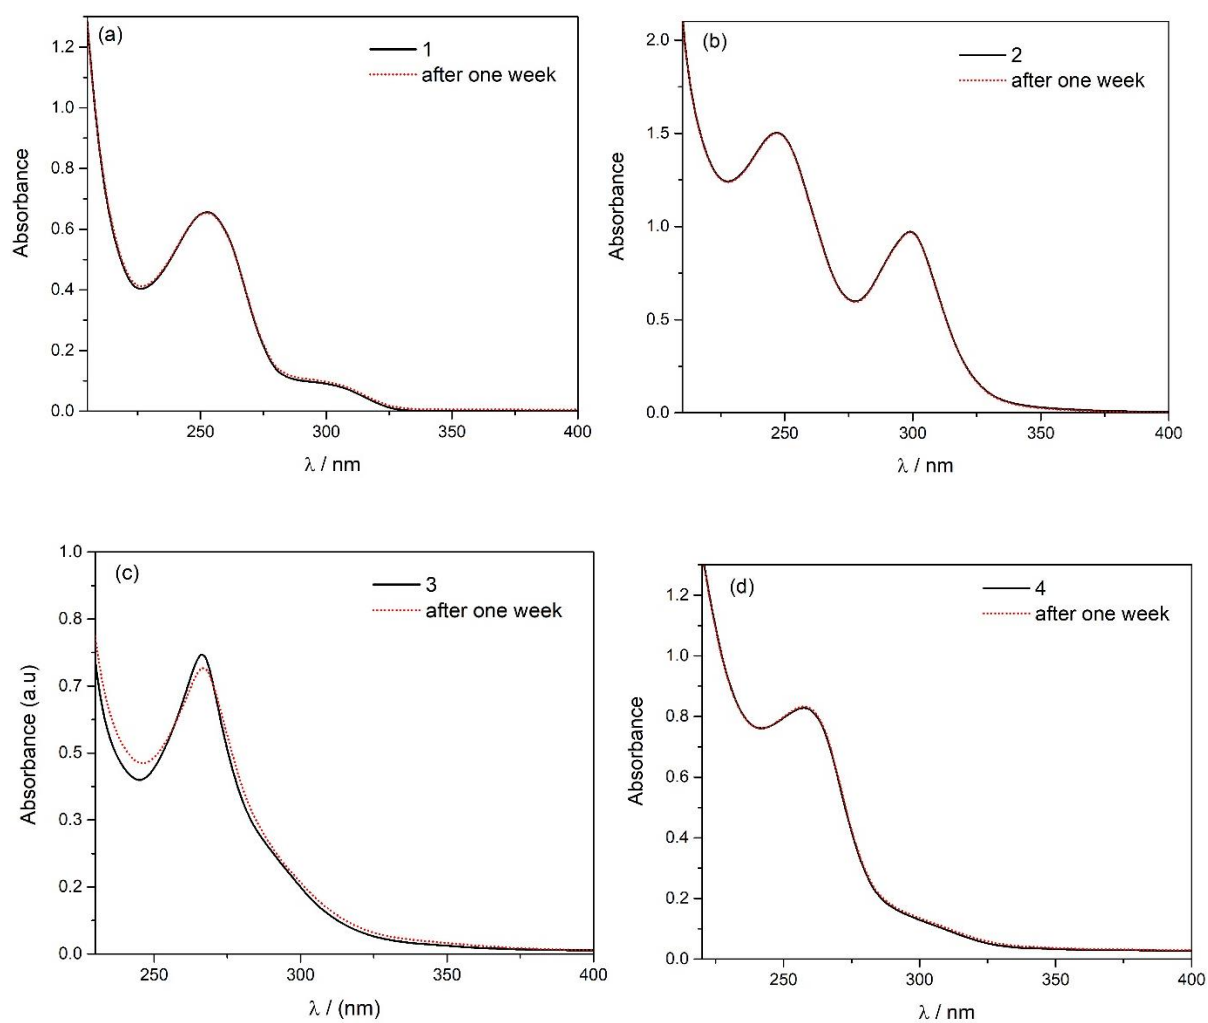

**Fig. S15.** (a-d) Time dependent UV-vis spectrum of complexes **1-4** in 5 mM Tris-HCl buffer (pH = 7.2) at room temperature.

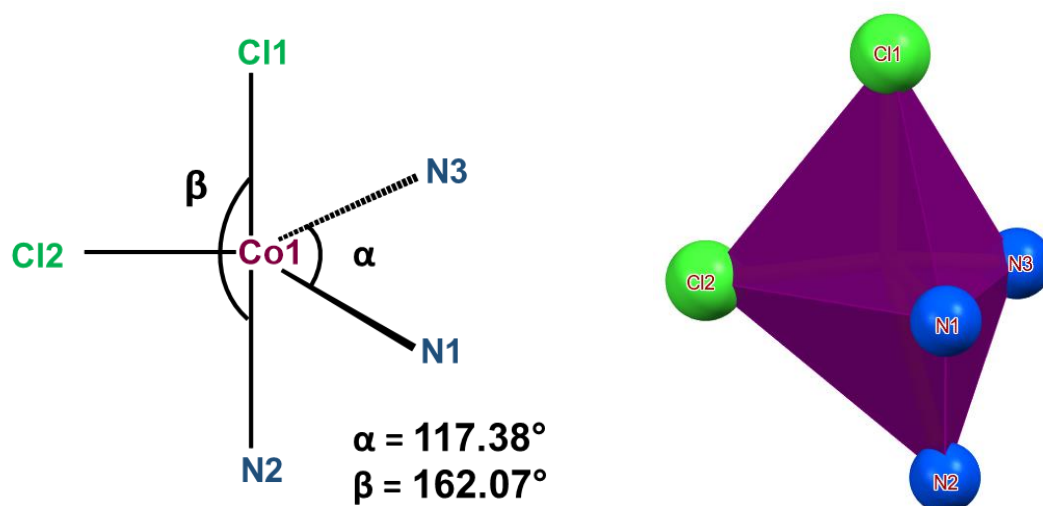

**Fig. S16.** Schematic drawing of trigonal bipyramidal geometry and polyhedron view of **1**.

a

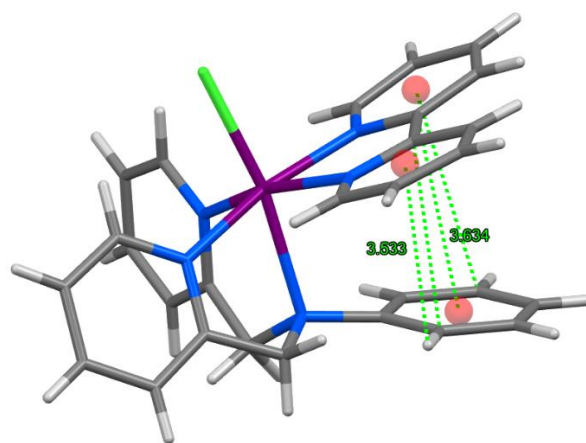

b

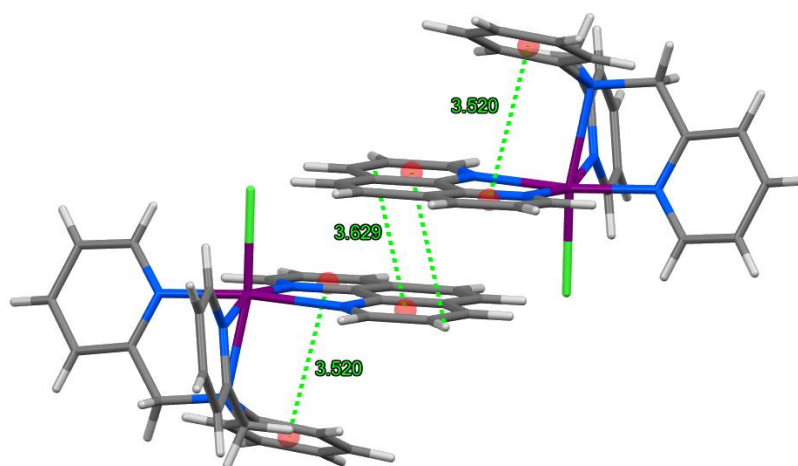

c

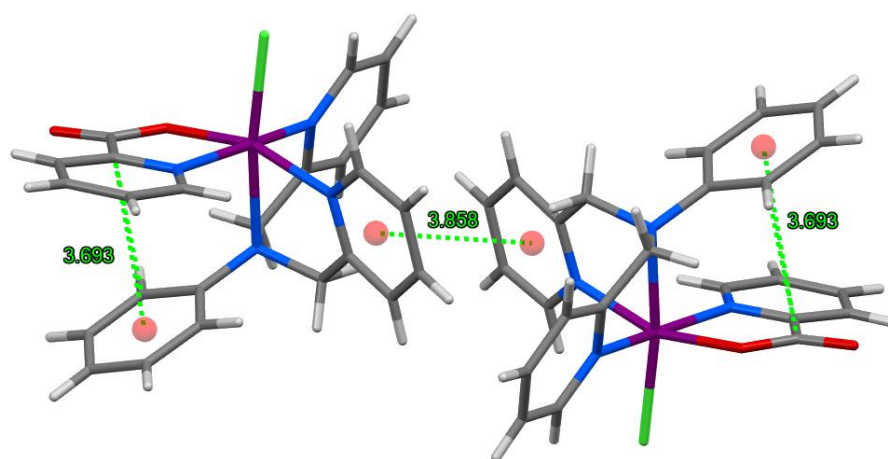

**Fig. S17.** (a-c)  $\pi$ - $\pi$  interaction between phenyl group of ligand **L** and bidentate ligands (bpy, phen, pic) in complexes **2-4**, respectively.

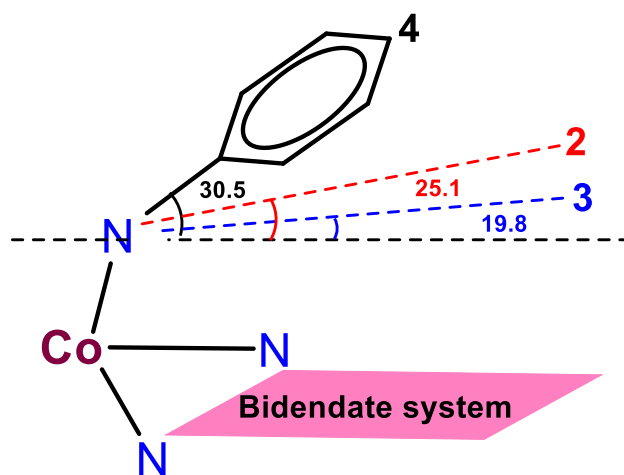

**Fig. S18.** Schematic drawing of **2–4** with the dihedral angles ( $^{\circ}$ ) benzene ring of **L** and the plane of the bidentate ligand system (bpy, phen and pic).

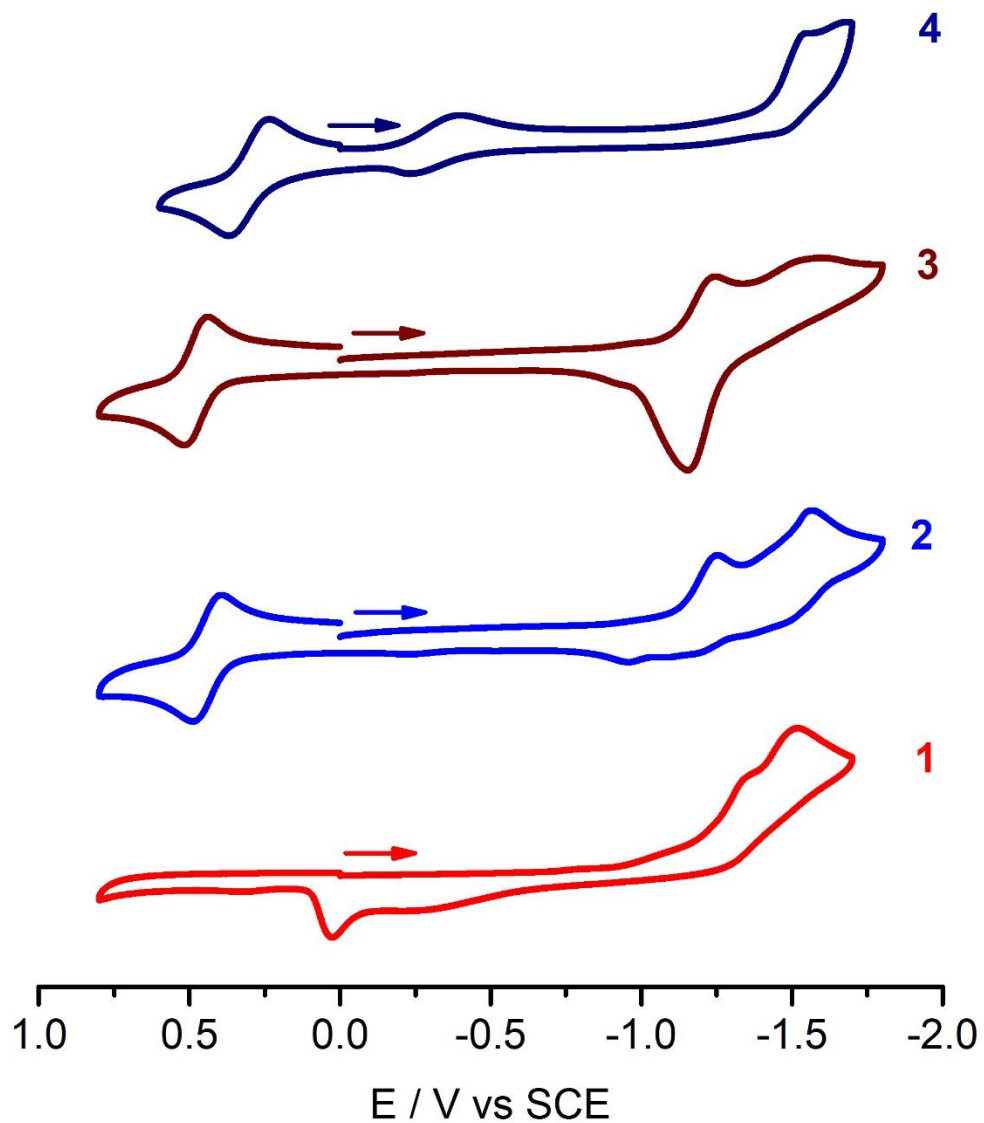

**Fig. S19.** Cyclic voltammogram of **1–4** (bottom to top) in acetonitrile using 0.1 M TBAP as supporting electrolyte versus SCE, scan rate  $100 \text{ mV s}^{-1}$ .

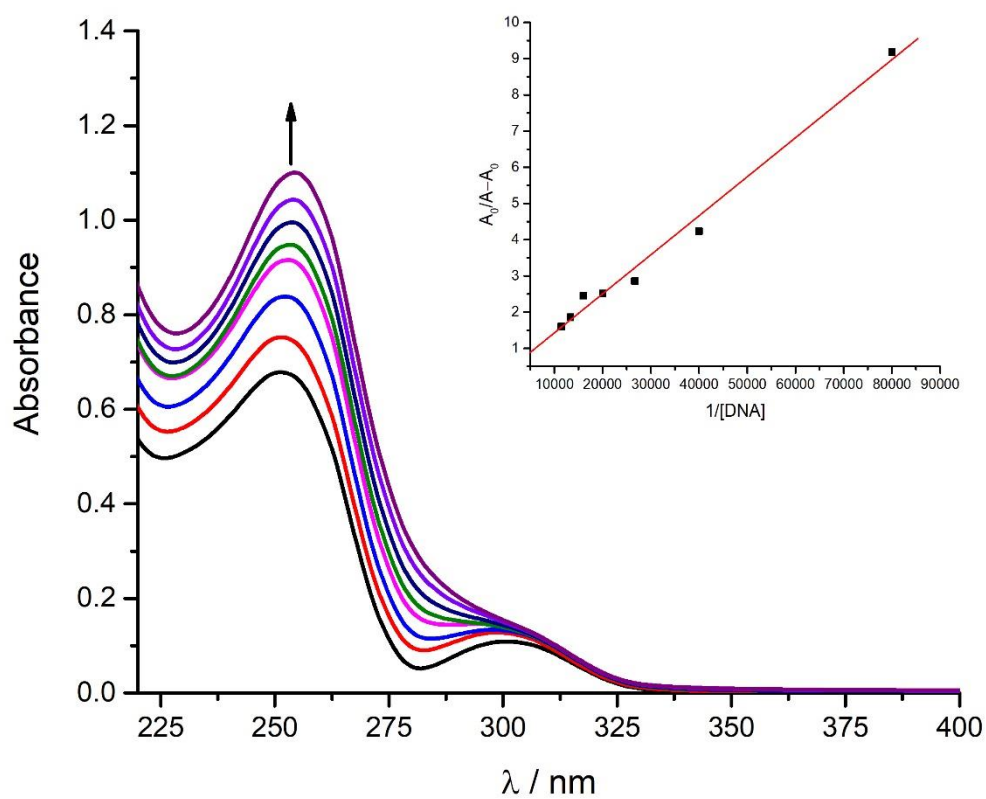

**Fig. S20.** Absorption spectra of **1** (66.7 μM) in the absence (black) and presence (colour) of ss-DNA (12.5, 25.0, 37.5, 50.0, 62.50, 75.0, 87.5 μM, respectively) in 5 mM Tris-HCl buffer (pH =7.2). The arrow shows the absorbance changes on increasing DNA concentration. Inset: the plot of  $A_0/A - A_0$  versus  $1/[DNA]$  for the calculation of binding constant of complex **1**.



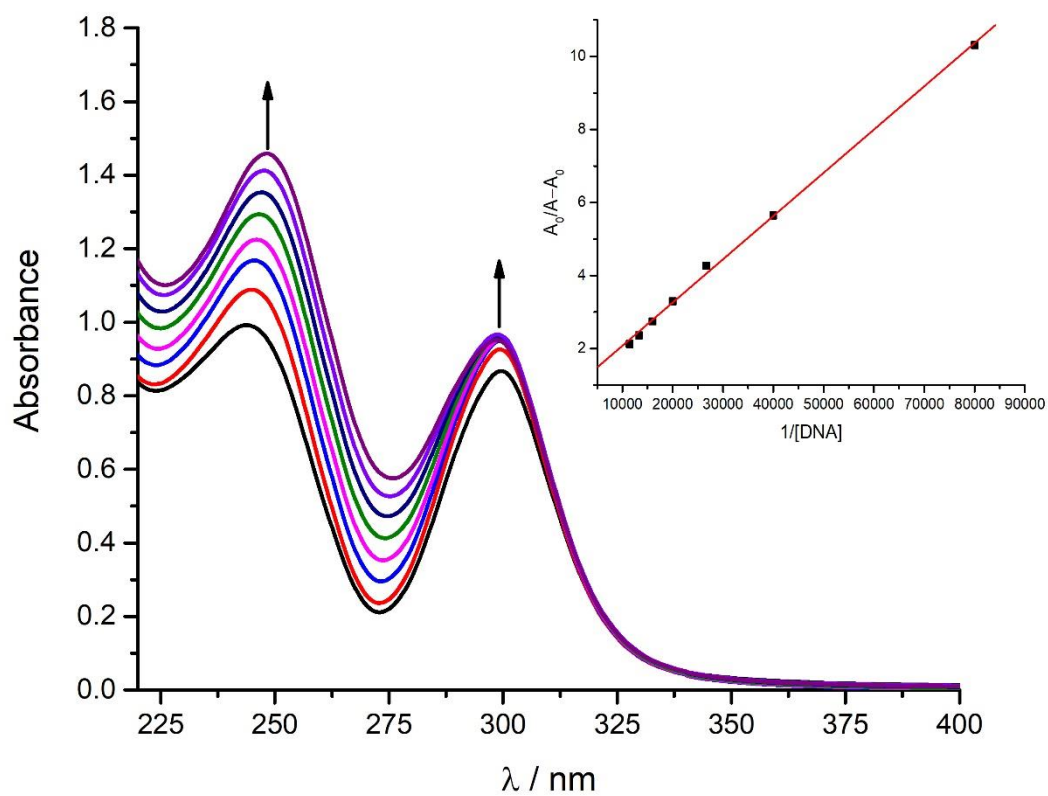

**Fig. S21.** Absorption spectra of **2** (66.7 μM) in the absence (black) and presence (colour) of ss-DNA (12.5, 25.0, 37.5, 50.0, 62.50, 75.0, 87.5 μM, respectively) in 5 mM Tris-HCl buffer (pH = 7.2). The arrow shows the absorbance changes on increasing DNA concentration. Inset: the plot of  $A_0/A - A_0$  versus  $1/[DNA]$  for the calculation of binding constant of complex **2**.

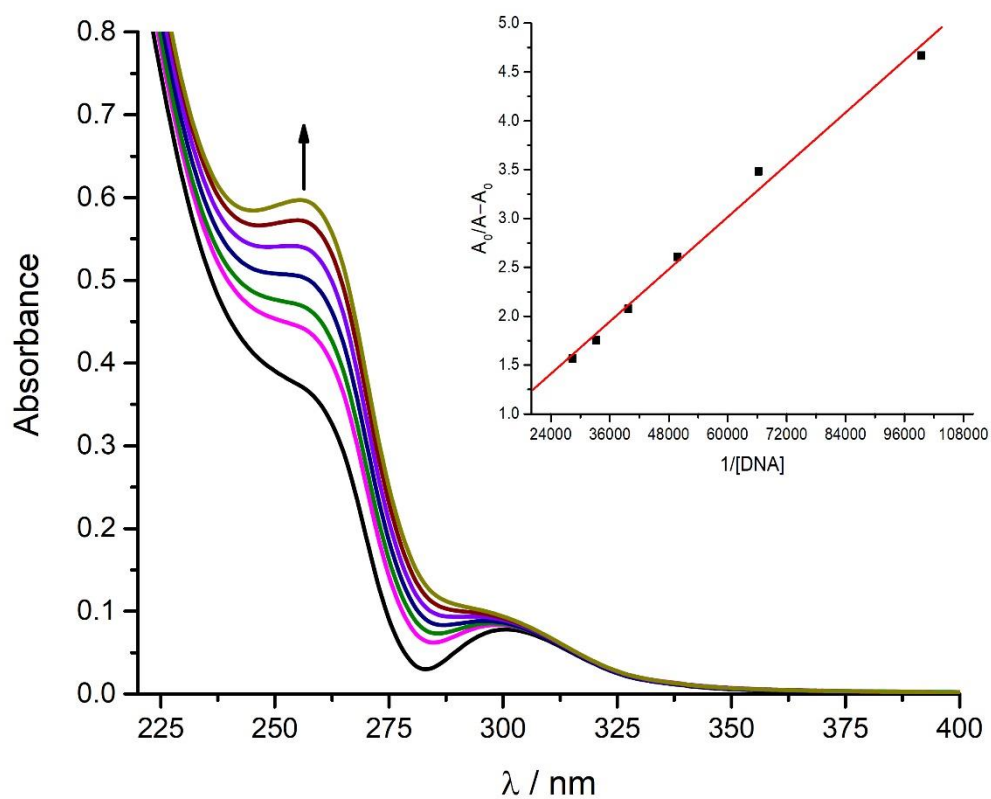

**Fig. S22.** Absorption spectra of **4** (20 μM) in the absence (black) and presence (colour) of ss-DNA (10.06, 15.09, 20.12, 25.15, 30.18, 35.21 μM, respectively) in 5 mM Tris-HCl buffer (pH =7.2). The arrow shows the absorbance changes on increasing DNA concentration. Inset: the plot of  $A_0/A-A_0$  versus  $1/[DNA]$  for the calculation of binding constant of complex **4**.

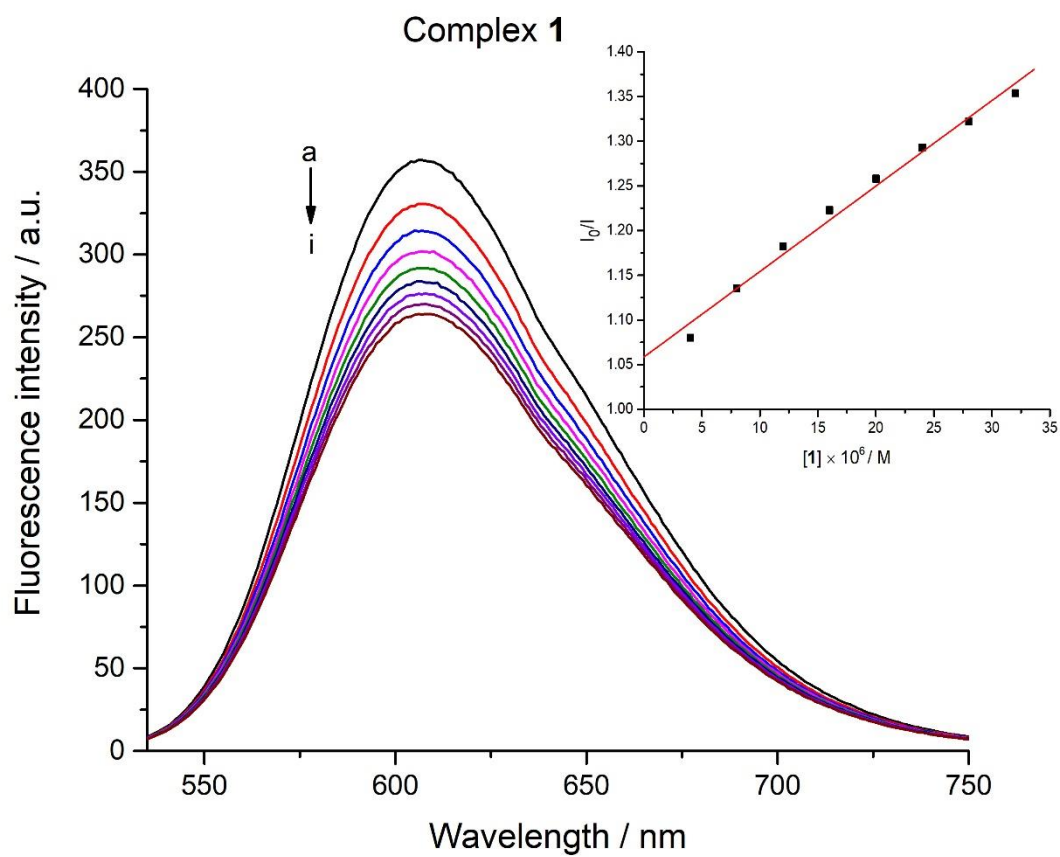

**Fig. S23.** Emission spectra of EB bound DNA in the presence of **1**. ( $[DNA] = 1 \times 10^{-4} M$ ,  $[EB] = 1 \times 10^{-5} M$ ,  $[Quencher](\mu M)$  for **1**: (a) 0, (b) 4, (c) 8, (d) 12, (e) 16, (f) 20, (g) 24, (h) 28, (i) 32. Inset: the plot of  $I_0/I$  versus  $[Quencher]$ ).

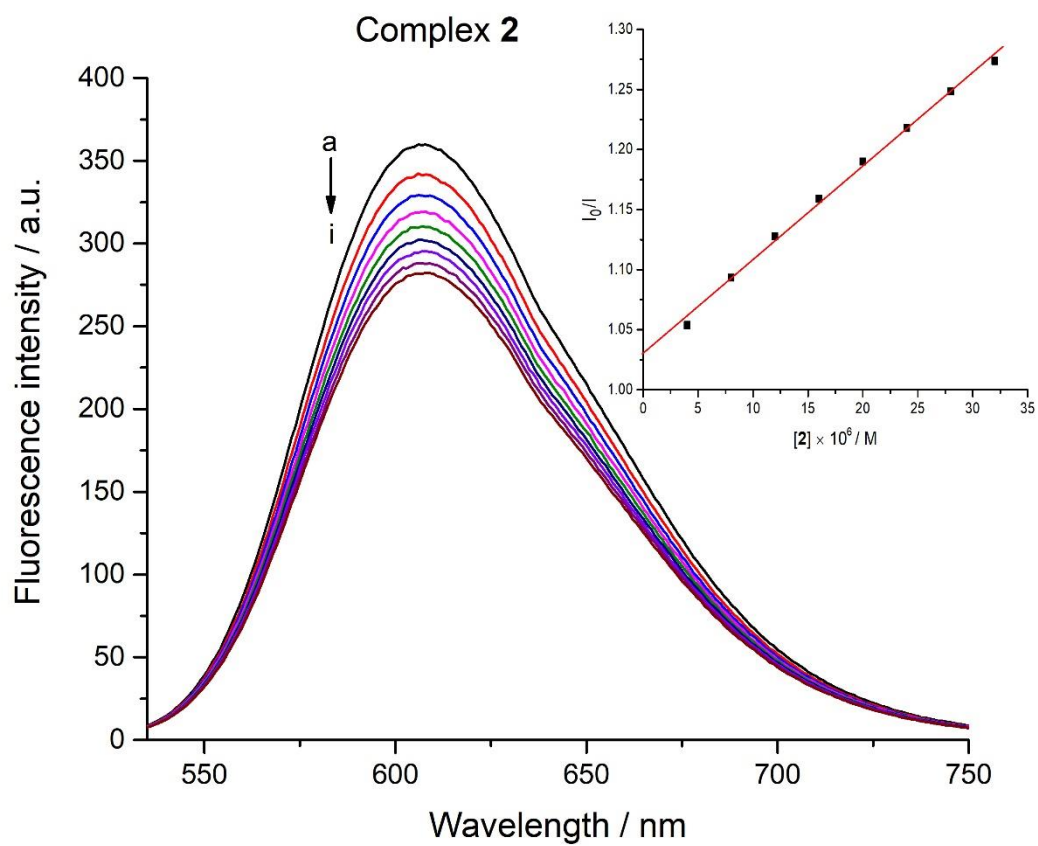

**Fig. S24.** Emission spectra of EB bound DNA in the presence of **2**. ( $[DNA] = 1 \times 10^{-4} M$ ,  $[EB] = 1 \times 10^{-5} M$ ,  $[Quencher](\mu M)$  for **1**: (a) 0, (b) 4, (c) 8, (d) 12, (e) 16, (f) 20, (g) 24, (h) 28, (i) 32. Inset: the plot of  $I_0/I$  versus  $[Quencher]$ ).

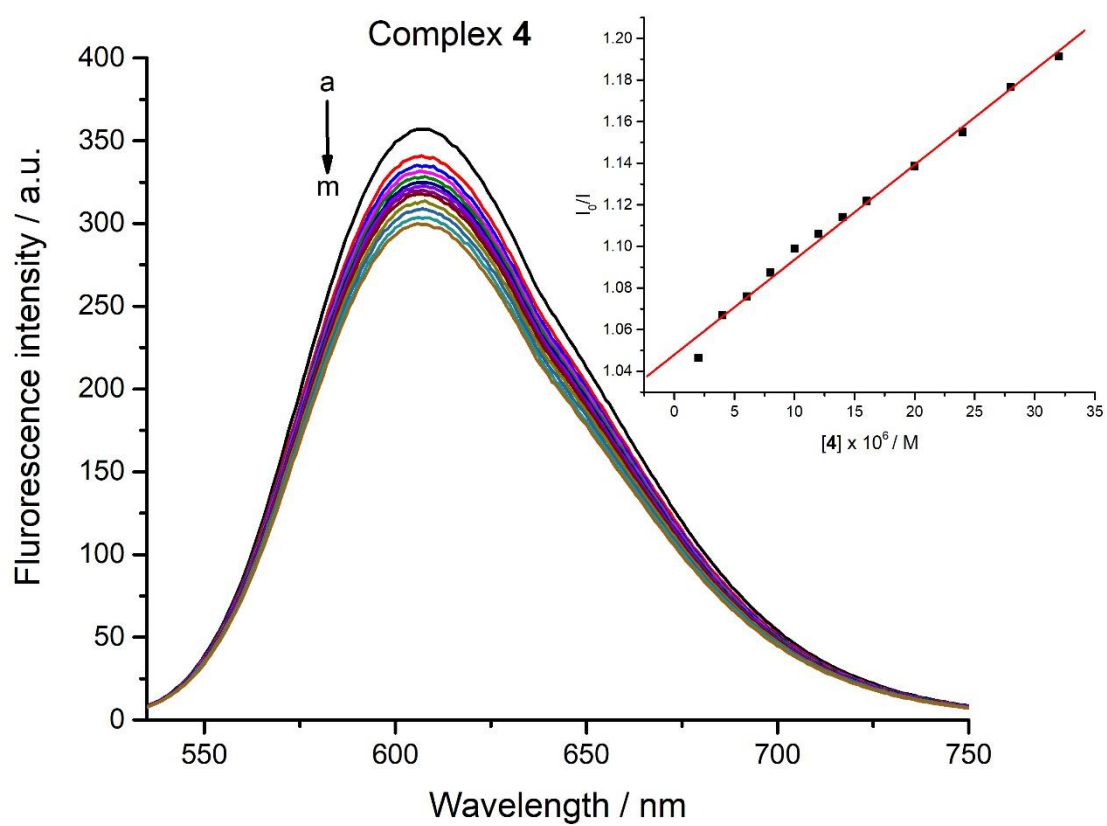

**Fig. S25.** Emission spectra of EB bound DNA in the presence of **4**. ( $[DNA] = 1 \times 10^{-4} M$ ,  $[EB] = 1 \times 10^{-5} M$ ,  $[Quencher](\mu M)$  for **1**: (a) 2, (b) 4, (c) 6, (d) 8, (e) 10, (f) 12, (g) 14, (h) 16, (i) 20, (j) 24, (k) 28, (m) 32. Inset: the plot of  $I_0/I$  versus  $[Quencher]$ ).

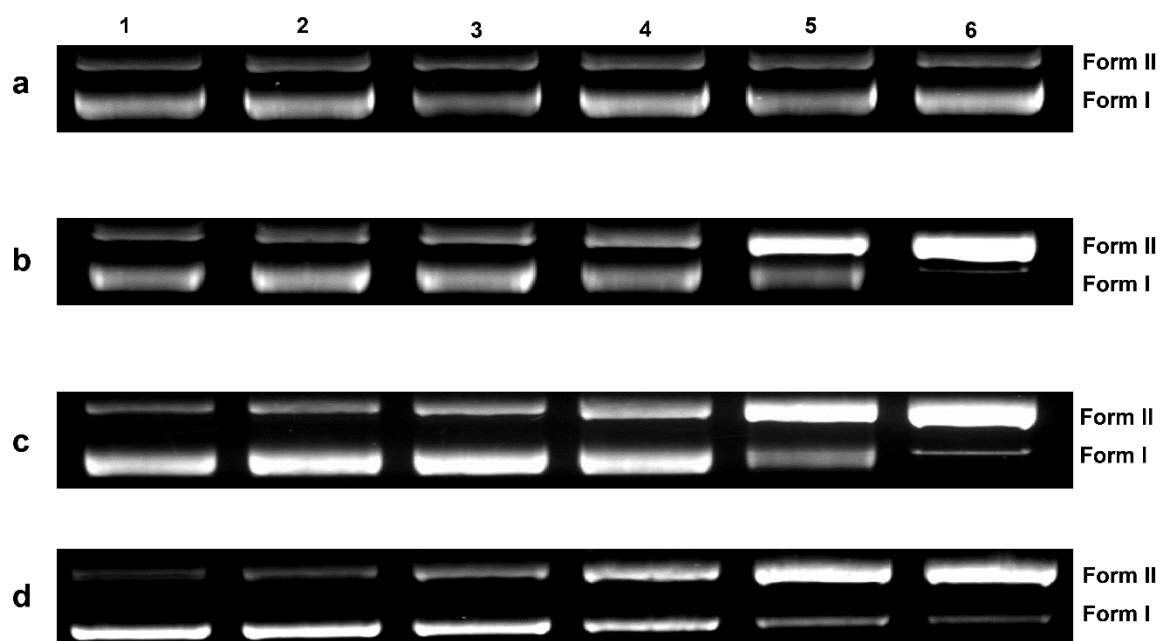

**Fig. S26:** Agarose gel showing the cleavage of plasmid DNA (pDNA 200 ng/ $\mu$ L) at different concentrations upon incubation at 37 °C for 3 h in 50 mM Tris-HCl buffer (pH 7.2). Lane 1: Control; Lane 2-6: pDNA + Complexes [(a) Complex 1: 50  $\mu$ M, 100  $\mu$ M, 200  $\mu$ M, 400  $\mu$ M, 500  $\mu$ M; (b-c) Complexes 2 and 3: 1  $\mu$ M, 5  $\mu$ M, 10  $\mu$ M, 25  $\mu$ M, 50  $\mu$ M; (d) Complex 4: 100  $\mu$ M, 250  $\mu$ M, 500  $\mu$ M, 750  $\mu$ M, 1 mM].

**Table S1:** Respective Cleavage Concentrations (1-4) and Percentage of Cleaved Forms of pDNA.

| <b>Complex 1</b> |                                  |            |             |
|------------------|----------------------------------|------------|-------------|
| S.No.            | Concentrations ( $\mu\text{M}$ ) | Form I (%) | Form II (%) |
| 1                | Control                          | 83         | 17          |
| 2                | 50                               | 80         | 20          |
| 3                | 100                              | 73         | 27          |
| 4                | 200                              | 80         | 20          |
| 5                | 400                              | 75         | 25          |
| 6                | 500                              | 80         | 20          |

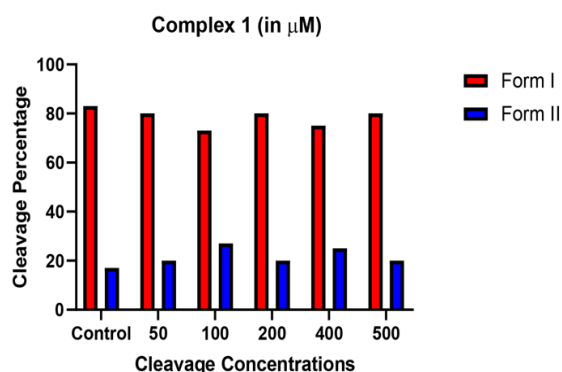

| <b>Complex 2</b> |                                  |            |             |
|------------------|----------------------------------|------------|-------------|
| S.No.            | Concentrations ( $\mu\text{M}$ ) | Form I (%) | Form II (%) |
| 1                | Control                          | 79         | 21          |
| 2                | 1                                | 78         | 22          |
| 3                | 5                                | 73         | 27          |
| 4                | 10                               | 62         | 38          |
| 5                | 25                               | 30         | 70          |
| 6                | 50                               | 2          | 98          |

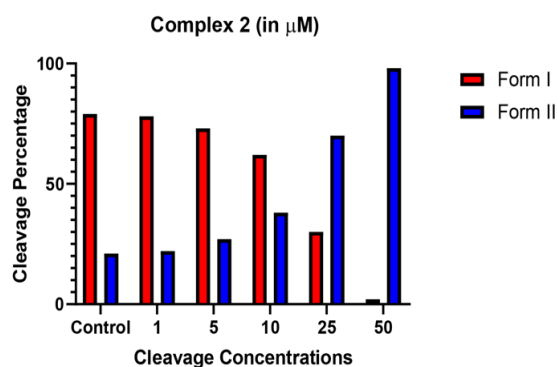

| <b>Complex 3</b> |                                  |            |             |
|------------------|----------------------------------|------------|-------------|
| S.No.            | Concentrations ( $\mu\text{M}$ ) | Form I (%) | Form II (%) |
| 1                | Control                          | 85         | 15          |
| 2                | 1                                | 82         | 18          |
| 3                | 5                                | 76         | 24          |
| 4                | 10                               | 65         | 35          |
| 5                | 25                               | 26         | 74          |
| 6                | 50                               | 5          | 95          |

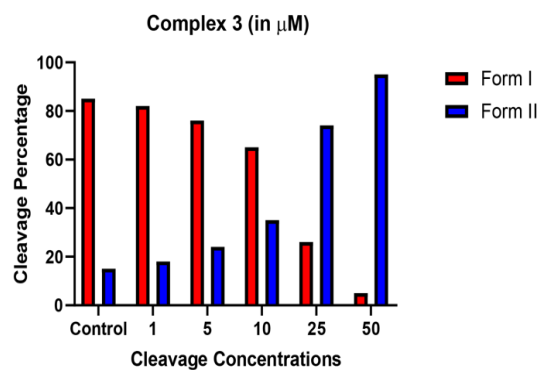

| <b>Complex 4</b> |                                  |            |             |
|------------------|----------------------------------|------------|-------------|
| S.No.            | Concentrations ( $\mu\text{M}$ ) | Form I (%) | Form II (%) |
| 1                | Control                          | 93         | 7           |
| 2                | 100                              | 85         | 15          |
| 3                | 250                              | 70         | 30          |
| 4                | 500                              | 43         | 57          |
| 5                | 750                              | 15         | 85          |
| 6                | 1000                             | 6          | 94          |

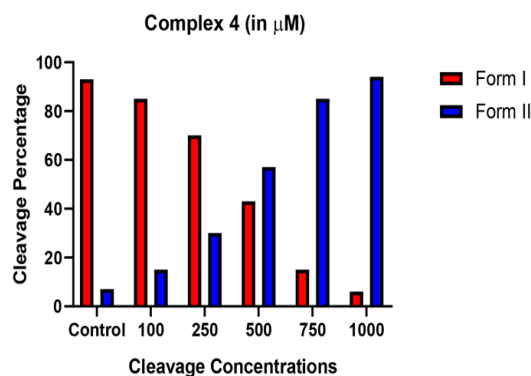

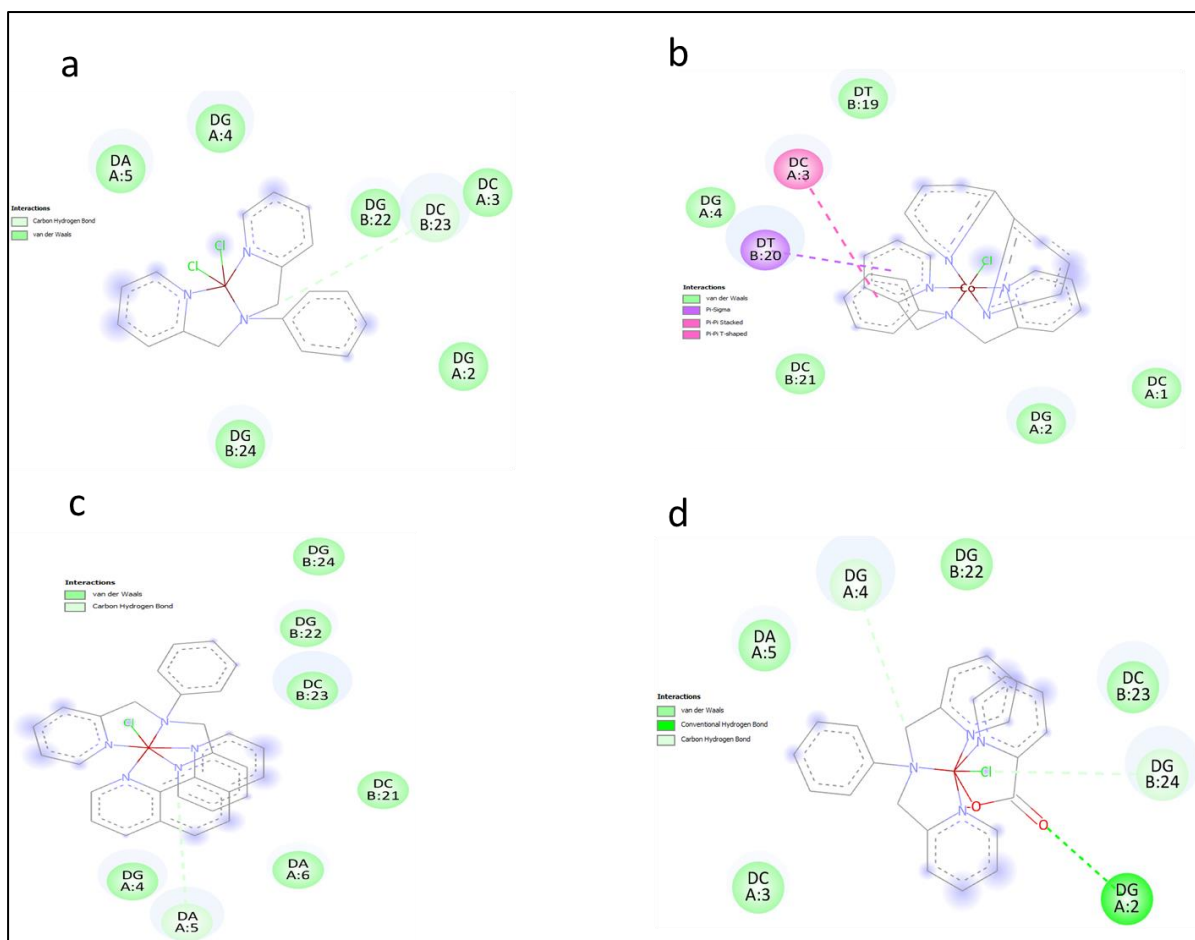

**Fig. S27.** (a-d) Interactions between complexes (1-4) and DNA, along with the van der Waals forces are represented in a 2-Dimensional format.



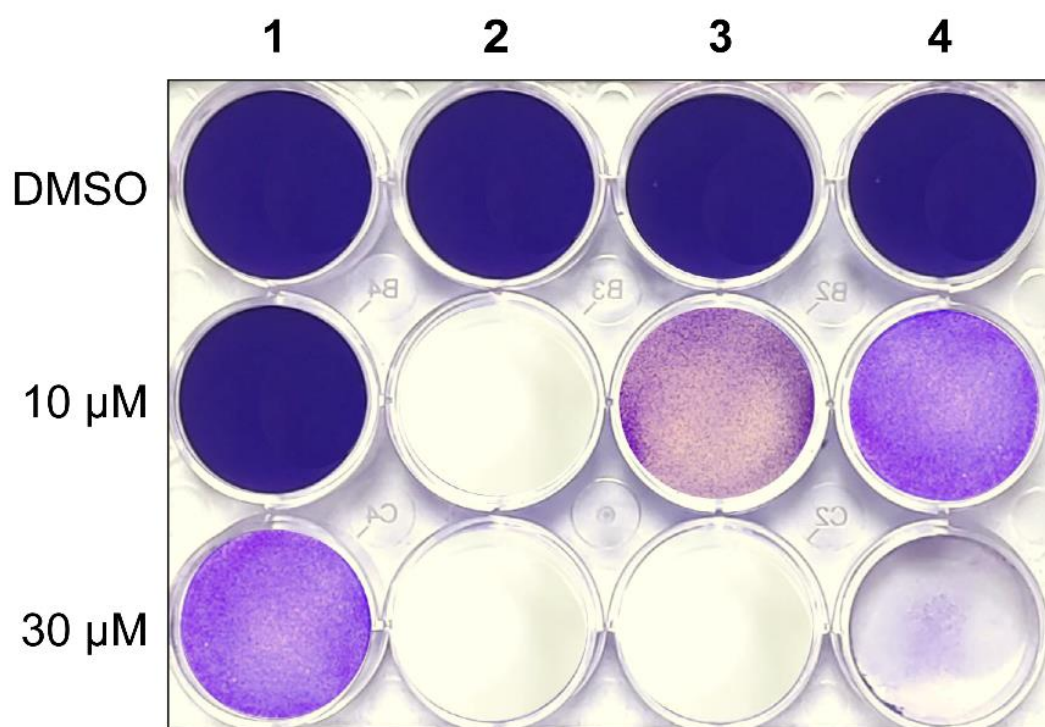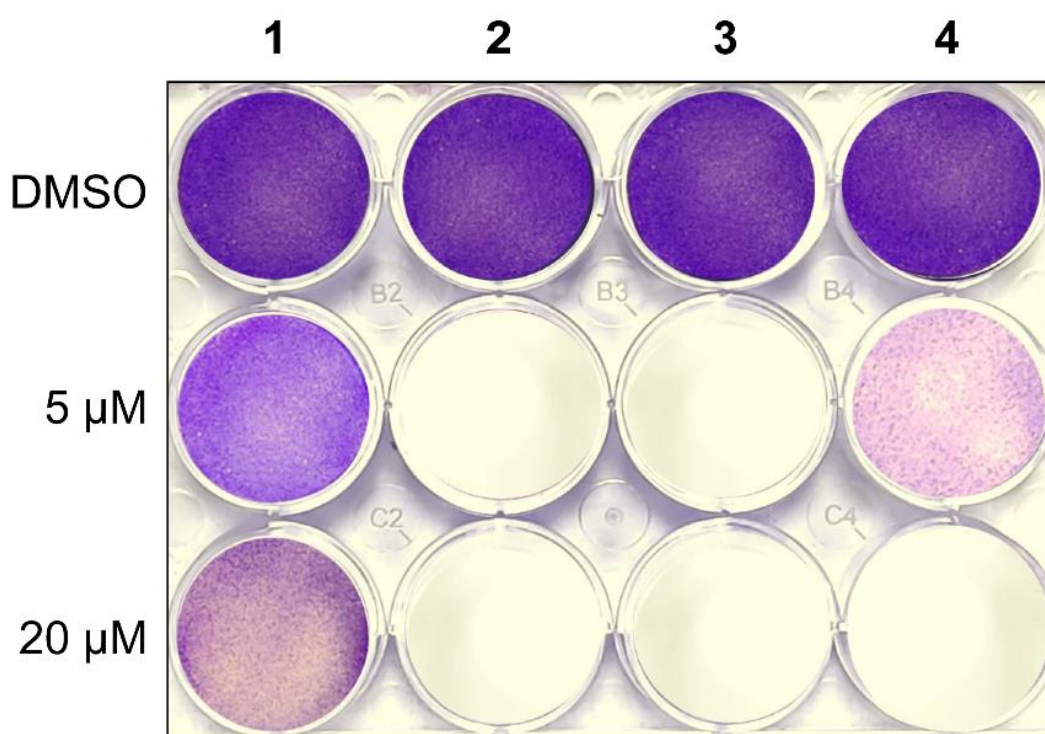

**Fig. S28.** Crystal violet staining images of A549 cells (top) and MDA-MB-231 cells (bottom) treated with 10  $\mu$ M and 30  $\mu$ M of **1-4** for 72 h. The purple colour indicates the number of live cancer cells, whereas its loss signifies the decrease in live cells survival.
